# Supplementary material
Source: publisher site journal article supplement (https://static.cambridge.org/content/id/urn:cambridge.org:id:article:S0014479719000048/resource/name/S0014479719000048supp001.doc)
Supplement: Supplementary file 1 [file S0014479719000048supp001.doc]

Table S1. Description of the rating scale used in the present study.

| Scale | Definition | Description |
| --- | --- | --- |
| **Husk cover** | |  |
| 1 | Excellent | Husk tightly covers ear tip and extends beyond it. |
| 2 | Fair | Covers ear tip tightly. |
| 3 | Exposed tip | Loosely covers ear up to its tip. |
| 4 | Grain exposed | Husk leaves do not cover the ear adequately, leaving its tip somewhat exposed. |
| 5 | Completely unacceptable | Poor husk cover, tips clearly exposed |
|  |  |  |
| **Plant aspect** | | |
| 1 | Excellent | Excellent plant height and ear size, low ear placement, resistance to foliar diseases and lodging |
| 2 | Very good | Very good plant height and ear size, low ear placement, resistance to foliar diseases and lodging |
| 3 | Good | Good plant height and ear size, relatively high ear placement, moderately resistance to foliar diseases and lodging |
| 4 | Fair | Stunted growth, small ears, moderately susceptible to foliar diseases and lodging |
| 5 | Poor | Stunted growth, small ears, susceptible to foliar diseases and lodging |
|  |  |  |
| **Ear aspect** | | |
| 1 | Excellent | Excellent in terms of cleanest and uniformity of the ears and large ears |
| 2 | Very good | Very good in terms of cleanest and uniformity of the ears and large ears |
| 3 | Good | Relatively clean and uniform ears |
| 4 | Fair | Relatively rotten, variable and small ears |
| 5 | Poor | Rotten, variable and small ears |
